# Supplementary material for: Cervical Cancer in Sub‐Saharan Africa: A Multinational Population‐Based Cohort Study of Care and Guideline Adherence
Source: PubMed Central journal article supplement — Oncologist. 2021 Mar 10;26(5):e807–16. doi: 10.1002/onco.13718 (PMC8100544; doi:10.1002/onco.13718), 2021-03-10
Supplement: ONCO-26-e807-s001.pdf [file ONCO-26-e807-s001.pdf]

Supplemental Tables for:

Cervical cancer in Sub-Saharan Africa: a multinational population-based cohort study on patterns and guideline adherence of care

Eva J Kantelhardt et al.

Supplemental table 1: The evaluation scheme in the manuscript groups the assumed relative impact of procedures and regimens; not all definitions could be based on controlled trials.

Here we present background information on our considerations.

| Treatment Modality                          | Authors                                         | Year                 | Source  | Stage        | Comment                                                                                                                                                                                                                                                      | Effect   | Consequence                                                                                      |
|---------------------------------------------|-------------------------------------------------|----------------------|---------|--------------|--------------------------------------------------------------------------------------------------------------------------------------------------------------------------------------------------------------------------------------------------------------|----------|--------------------------------------------------------------------------------------------------|
| <b>Surgery</b>                              |                                                 |                      |         |              |                                                                                                                                                                                                                                                              |          |                                                                                                  |
| Overview                                    | Verleye et al                                   | 2009                 | □1      | FIGO I- IIB  | Different types of hysterectomies as of 2009, freely accessible review                                                                                                                                                                                       |          | Basis of the definition of deviations in primarily surgical patients                             |
| Radical surgery in locally advanced disease | Greer et al                                     | 2009                 | □2      | FIGO IIB     | Radical hysterectomy is not directly recommended but was under examination in 2009 together with NACT.                                                                                                                                                       |          | Considered minor deviation if combined with lymphadenectomy                                      |
| Neoadjuvant chemotherapy (NACT)             | Greer et al                                     | 2009                 | □2      | FIGO IIB     | NACT was under examination in 2009, thus not considered for evaluation.                                                                                                                                                                                      |          | Not considered                                                                                   |
| <b>Radiotherapy</b>                         |                                                 |                      |         |              |                                                                                                                                                                                                                                                              |          |                                                                                                  |
| Additional Brachytherapy (BT)               | Greer et al<br>Han et al                        | 2009<br>2013         | □3      | FIGO IB- III | If there is intact primary tumour, BT is required and has a strong positive influence on survival.                                                                                                                                                           | HRR=0.66 | Lack of BT considered major deviation                                                            |
| Concurrent chemotherapy (CT)                | Vale et al                                      | 2008                 | □4      | FIGO IB- III | Any curative radiotherapy should be combined with CT, but influence on survival is weaker than BT.                                                                                                                                                           | HRR=0.81 | Lack of concurrent CT considered minor deviation                                                 |
| Dose of concurrent CT                       | Eifel et al                                     | 2006                 | □5      | FIGO IB- III | To allow for different established protocols and adaption to patient status and toxicity                                                                                                                                                                     |          | Minimum of 2 cycles considered as CT received                                                    |
| Minimum dose of BT for guideline adherence  | Greer et al<br>Viswanathan et al<br>Einck et al | 2009<br>2012<br>2014 | 2, 6, 7 |              | Guideline recommendation regarding BT is imprecise. Retrospective calculation of bioequivalent dose impossible when documentation was incomplete. Therefore simplification: Any dose equivalent to or higher than established regimens accepted as adequate. |          | BT doses of $\geq 16.6$ Gy in addition to guideline-recommended 45 Gy external beam radiotherapy |
| Minimum dose for curative potential         | Koh et al                                       | 2017                 | 8       | FIGO IB- III | Lowest dose recommendation to be found for external beam radiotherapy only is 40 Gy plus "boost".                                                                                                                                                            |          | 45 Gy considered minimum curative dose and major deviation                                       |

## References of Supplemental table 1

1. Verleye L, Vergote I, Reed N, Ottevanger PB. Quality assurance for radical hysterectomy for cervical cancer: The view of the European Organization for Research and Treatment of Cancer--Gynecological Cancer Group (EORTC-GCG). *Ann Oncol* 2009; 20(10):1631–8.
2. Greer BE et al. Practice Guidelines in Oncology: Cervical Cancer V. 1.2010; 2009 [cited 2018 Mar 31]. Available from: URL: <https://de.scribd.com/document/369113825/Cervical>.

3. Han K, Milosevic M, Fyles A, Pintilie M, Viswanathan AN. Trends in the utilization of brachytherapy in cervical cancer in the United States. *Int J Radiat Oncol Biol Phys* 2013 [cited 2017 Nov 13]; 87(1):111–9.
4. Vale CL, et al. Reducing uncertainties about the effects of chemoradiotherapy for cervical cancer: A systematic review and meta-analysis of individual patient data from 18 randomized trials. *J Clin Oncol* 2008 [cited 2017 Nov 29]; 26(35):5802–12.
5. Eifel PJ. Concurrent chemotherapy and radiation therapy as the standard of care for cervical cancer. *Nat Clin Pract Oncol* 2006 [cited 2017 Nov 14]; 3(5):248–55.
6. Viswanathan AN, Creutzberg CL, Craighead P, McCormack M, Toita T, Narayan K et al. International brachytherapy practice patterns: a survey of the Gynecologic Cancer Intergroup (GCIG). *Int J Radiat Oncol Biol Phys* 2012; 82(1):250–5.
7. Einck JP, Hudson A, Shulman AC, Yashar CM, Dieng MM, Diagne M et al. Implementation of a high-dose-rate brachytherapy program for carcinoma of the cervix in Senegal: a pragmatic model for the developing world. *Int J Radiat Oncol Biol Phys* 2014; 89(3):462–7.
8. Koh WJ et al. NCCN Harmonized Guidelines for Sub-Saharan Africa: Cervical Cancer 1.2017 [cited 2018 Mar 31]. Available from: URL: [https://www.nccn.org/professionals/physician\\_gls/pdf/cervical\\_harmonized-africa.pdf](https://www.nccn.org/professionals/physician_gls/pdf/cervical_harmonized-africa.pdf).

Supplemental table 2: Baseline mortality according to country from WHO life tables; nMx = age-specific death rate between ages x and x+n  
(<http://apps.who.int/gho/data/node.main.LIFECOUNTRY?lang=en> (accessed Apr 12, 2018))

| Indicator | Age Group   | Ivory Coast       |                      |                         |                  |                        |                   |                    |                      | Mean of age-specific death rate between ages x and x+n |
|-----------|-------------|-------------------|----------------------|-------------------------|------------------|------------------------|-------------------|--------------------|----------------------|--------------------------------------------------------|
|           |             | Benin 2013 Female | Ethiopia 2013 Female | Ivory Coast 2013 Female | Mali 2013 Female | Mozambique 2013 Female | Kenya 2013 Female | Uganda 2013 Female | Zimbabwe 2013 Female |                                                        |
| nMx       | <1 year     | 0.067             | 0.04                 | 0.065                   | 0.075            | 0.059                  | 0.035             | 0.038              | 0.045                | 0.0530                                                 |
| nMx       | 1-4 years   | 0.01              | 0.005                | 0.007                   | 0.013            | 0.006                  | 0.004             | 0.005              | 0.007                | 0.0071                                                 |
| nMx       | 5-9 years   | 0.003             | 0.002                | 0.008                   | 0.004            | 0.004                  | 0.002             | 0.003              | 0.002                | 0.0035                                                 |
| nMx       | 10-14 years | 0.002             | 0.002                | 0.004                   | 0.003            | 0.003                  | 0.002             | 0.002              | 0.002                | 0.0025                                                 |
| nMx       | 15-19 years | 0.002             | 0.002                | 0.005                   | 0.003            | 0.003                  | 0.002             | 0.002              | 0.002                | 0.0026                                                 |
| nMx       | 20-24 years | 0.003             | 0.002                | 0.006                   | 0.004            | 0.005                  | 0.003             | 0.003              | 0.003                | 0.0036                                                 |
| nMx       | 25-29 years | 0.004             | 0.003                | 0.007                   | 0.004            | 0.008                  | 0.003             | 0.005              | 0.005                | 0.0049                                                 |
| nMx       | 30-34 years | 0.004             | 0.004                | 0.009                   | 0.005            | 0.01                   | 0.004             | 0.006              | 0.007                | 0.0061                                                 |
| nMx       | 35-39 years | 0.005             | 0.005                | 0.012                   | 0.006            | 0.013                  | 0.005             | 0.008              | 0.013                | 0.0084                                                 |
| nMx       | 40-44 years | 0.006             | 0.006                | 0.013                   | 0.007            | 0.013                  | 0.006             | 0.009              | 0.016                | 0.0095                                                 |
| nMx       | 45-49 years | 0.007             | 0.007                | 0.014                   | 0.008            | 0.012                  | 0.006             | 0.011              | 0.016                | 0.0101                                                 |
| nMx       | 50-54 years | 0.009             | 0.008                | 0.016                   | 0.011            | 0.013                  | 0.008             | 0.012              | 0.016                | 0.0116                                                 |
| nMx       | 55-59 years | 0.012             | 0.011                | 0.02                    | 0.014            | 0.016                  | 0.011             | 0.014              | 0.016                | 0.0143                                                 |
| nMx       | 60-64 years | 0.019             | 0.017                | 0.03                    | 0.022            | 0.022                  | 0.017             | 0.019              | 0.019                | 0.0206                                                 |
| nMx       | 65-69 years | 0.03              | 0.027                | 0.046                   | 0.036            | 0.033                  | 0.027             | 0.029              | 0.028                | 0.0320                                                 |
| nMx       | 70-74 years | 0.049             | 0.045                | 0.072                   | 0.061            | 0.052                  | 0.044             | 0.047              | 0.044                | 0.0518                                                 |
| nMx       | 75-79 years | 0.079             | 0.073                | 0.111                   | 0.102            | 0.083                  | 0.072             | 0.076              | 0.071                | 0.0834                                                 |
| nMx       | 80-84 years | 0.127             | 0.12                 | 0.173                   | 0.172            | 0.132                  | 0.119             | 0.123              | 0.115                | 0.1351                                                 |
| nMx       | 85+ years   | 0.224             | 0.217                | 0.276                   | 0.285            | 0.228                  | 0.234             | 0.22               | 0.212                | 0.2370                                                 |

Supplemental table 3: Therapy receipt and evaluation of degree of guideline adherence (see table 1) in the “Population-based Cohort” stratified by FIGO stage (n=632). Colors depict the degree of adherence: green=optimal, light green=minor and yellow=major deviation, orange=CDT without curative potential, and red=no CDT.

EBRT=External beam radiotherapy, CDT=Cancer-directed therapy, FU=Follow-up, time of observation since diagnosis

| <b>Therapy reported in files<br/>(regardless of guideline adherence)</b>               | <b>“Population-based<br/>Cohort”<br/>(n=632)</b> | <b>FIGO I<br/>(n=49)</b> | <b>FIGO II<br/>(n=91)</b> | <b>FIGO III<br/>(n=123)</b> | <b>FIGO IV<br/>(n=99)</b> | <b>FIGO<br/>unknown<br/>(n=48)</b> |
|----------------------------------------------------------------------------------------|--------------------------------------------------|--------------------------|---------------------------|-----------------------------|---------------------------|------------------------------------|
| Some form of surgery                                                                   | 82 (13%)                                         | 27 (55%)                 | 22 (24%)                  | 17 (14%)                    | 10 (10%)                  | 6 (13%)                            |
| Some form of EBRT after surgery                                                        | 22 (3%)                                          | 2 (4%)                   | 9 (10%)                   | 5 (4%)                      | 5 (5%)                    | 1 (2%)                             |
| Some form of primary EBRT                                                              | 73 (12%)                                         | 1 (2%)                   | 27 (30%)                  | 32 (26%)                    | 10 (10%)                  | 3 (6%)                             |
| Chemotherapy only                                                                      | 66 (10%)                                         | 0 (0%)                   | 19 (21%)                  | 23 (19%)                    | 21 (21%)                  | 3 (6%)                             |
| No CDT detected at any timepoint                                                       | 189 (30%)                                        | 21 (43%)                 | 23 (25%)                  | 51 (41%)                    | 58 (59%)                  | 36 (75%)                           |
| Not traced                                                                             | 222 (35%)                                        |                          |                           |                             |                           |                                    |
| <b>Therapy evaluation<br/>(degree of guideline adherence<br/>according to table 1)</b> |                                                  |                          |                           |                             |                           |                                    |
| <b>Guideline-adherent</b>                                                              | <b>33 (5%)</b>                                   | <b>21 (53%)</b>          | <b>9 (12%)</b>            | <b>3 (3%)</b>               |                           |                                    |
| Minor deviation                                                                        | 12 (2%)                                          | 1 (3%)                   | 12 (16%)                  | 2 (2%)                      |                           |                                    |
| Major deviation                                                                        | 52 (8%)                                          | 6 (15%)                  | 18 (24%)                  | 28 (28%)                    |                           |                                    |
| CDT without curative potential                                                         | 68 (11%)                                         | 0 (0%)                   | 29 (39%)                  | 39 (39%)                    |                           |                                    |
| No CDT detected, FU ≥ 3                                                                | 48 (8%)                                          | 12 (30%)                 | 7 (9%)                    | 28 (28%)                    |                           |                                    |
| Evaluation not feasible                                                                | 194 (31%)                                        |                          |                           |                             |                           |                                    |
| FIGO I-III: No CDT, FU < 3 months                                                      | 47 (7%)                                          |                          |                           |                             |                           |                                    |
| FIGO unknown, any therapy or<br>none                                                   | 45 (7%)                                          |                          |                           |                             |                           |                                    |
| FIGO IV, any approach                                                                  | 99 (16%)                                         |                          |                           |                             |                           |                                    |
| Not traced                                                                             | 222 (35%)                                        |                          |                           |                             |                           |                                    |

Supplemental table 4: Epidemiological, economical, and cancer care infrastructure indicators. Estimates are the most recent available in the respective international institutions' data tools.

BT=Brachytherapy; EBRT=External beam radiotherapy; GDP=Gross Domestic Product; USD=United States Dollar

| Country     | Annual cancer cases/inhabitants<br>2020[1] | Share of GDP spent on health care<br>2017[2] | GDP per capita as International USD<br>2019[3] | EBRT machines (MV/MeV therapy)<br>2019[4] | BT machines<br>2019[4] | Cancer Centers with radioteletherapy<br>2020[1] |
|-------------|--------------------------------------------|----------------------------------------------|------------------------------------------------|-------------------------------------------|------------------------|-------------------------------------------------|
| Benin       | 5,100/11,176,000                           | 2.49%                                        | 3,423.6                                        | 0                                         | 0                      | 0                                               |
| Ethiopia    | 60,960/104,957,000                         | 3.30%                                        | 2,311.7                                        | 2                                         | 1                      | 1                                               |
| Ivory Coast | 12,000/24,295,000                          | 4.19%                                        | 5,455.4                                        | 2                                         | 0                      | 1                                               |
| Kenya       | 41,000/49,700,000                          | 5.17%                                        | 4,509.3                                        | 12                                        | 5                      | 6                                               |
| Mali        | 9,350/18,542,000                           | 3.88%                                        | 2,423.8                                        | 1                                         | 0                      | 1                                               |
| Mozambique  | 22,010/29,669,000                          | 8.17%                                        | 1,333.5                                        | 1                                         | 0                      | 1                                               |
| Uganda      | 29,380/42,863,000                          | 6.53%                                        | 2,271.6                                        | 1                                         | 1                      | 1                                               |
| Zimbabwe    | 15,520/16,530,000                          | 4.73%                                        | 2,953.5                                        | 7                                         | 3                      | 3                                               |
|             |                                            |                                              |                                                |                                           |                        |                                                 |
| USA         | 1,604,000/324,459,000                      | 16.89%                                       | 65,118.4                                       | 3536                                      | 776                    | 2,153                                           |
| Australia   | 122,000/24,451,000                         | 9.28%                                        | 53,320.3                                       | 218                                       | 12                     | 98                                              |

## REFERENCES

1. <https://dirac.iaea.org/Query/Map2?mapId=0> Accessed December 06, 2020.
2. <https://data.worldbank.org/indicator/SH.XPD.CHEX.GD.ZS> Accessed December 20, 2020.
3. <https://data.worldbank.org/indicator/NY.GDP.PCAP.PP.CD> Accessed December 06, 2020.
4. <https://dirac.iaea.org/Data/CountriesLight> Accessed December 06, 2020.
