# Supplementary material for: Cervical Cancer in Sub‐Saharan Africa: A Multinational Population‐Based Cohort Study of Care and Guideline Adherence
Source: PubMed Central journal article supplement — Oncologist. 2021 Mar 10;26(5):e807–16. doi: 10.1002/onco.13718 (PMC8100544; doi:10.1002/onco.13718), 2021-03-10
Supplement: ONCO-26-e807-s002.pdf [file ONCO-26-e807-s002.pdf]

Supplemental Figures for:  
Cervical cancer in Sub-Saharan Africa: a multinational population-based cohort study on patterns and guideline adherence of care  
Eva J Kantelhardt et al.

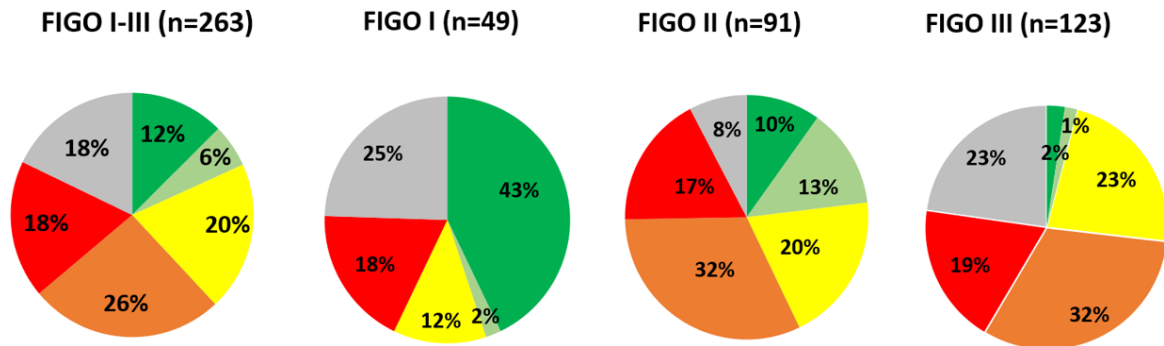

Supplemental figure 1: Guideline adherence stratified by FIGO stages I-III decreased with increasing stage ( $p < 0.001$ ). Colours depict the degree of adherence in green=optimal, light green=minor and yellow=major deviation, orange=CDT without curative potential, red=no CDT and follow-up  $\geq 3$  months, and light grey=no CDT and follow-up  $< 3$  months.

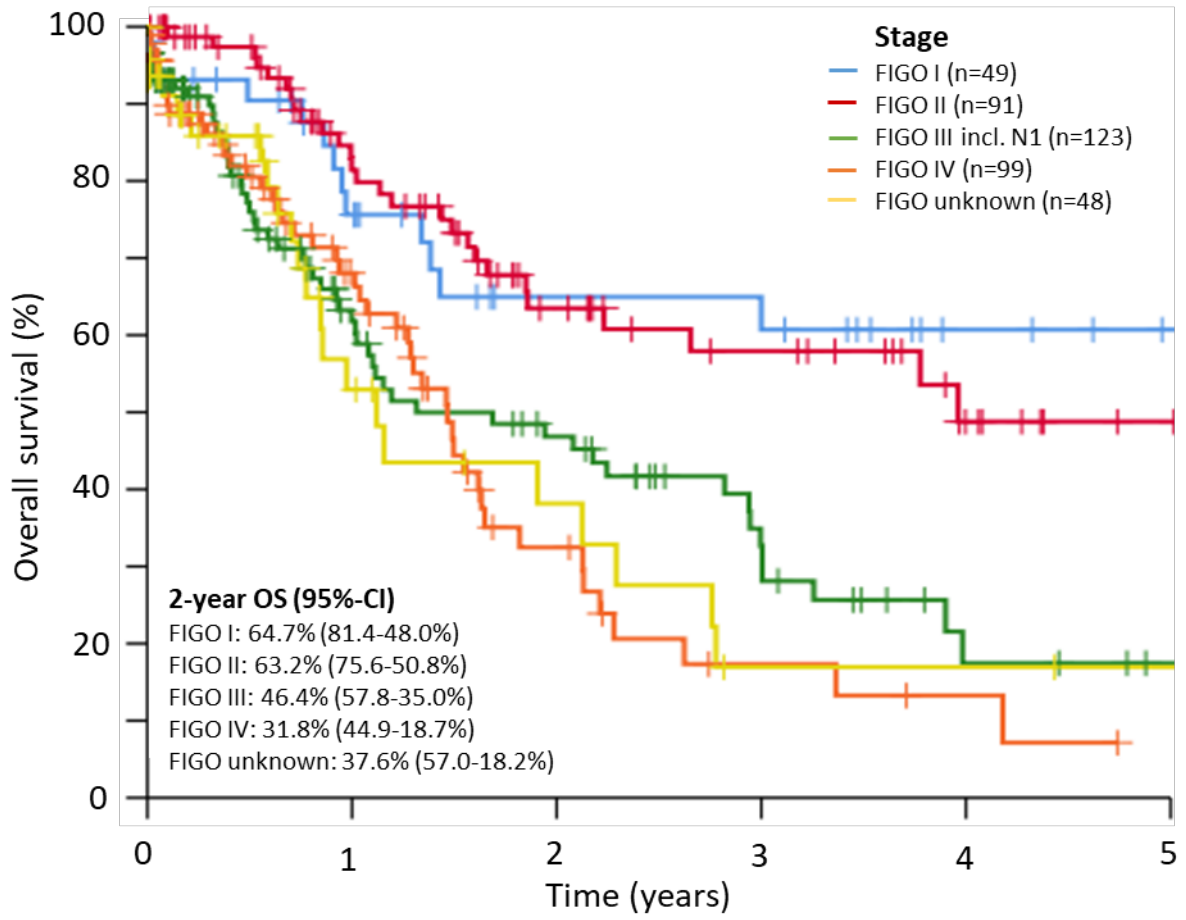

Supplemental figure 2: Overall survival stratified by FIGO stage in “Traced Cohort” (n=410). FIGO I and II vs. III and IV in Log rank test:  $p < 0.001$ . Patients with hospital files found or successful telephone contact were considered as “traced”.
